# Supplementary material for: The Midbrain Preisthmus: A Poorly Known Effect of the Isthmic Organizer
Source: MDPI journal article supplement (doi:10.3390/ijms24119769), 2023-06-05
Supplement: s1 [file s1]

**Table S1.** List of studied genes.

|              |                                 |
|--------------|---------------------------------|
| Signal       | preisthmus                      |
| Ascl1 /Mash1 | E11.5-,E13,5+                   |
| Astn2        | P56 -E15-                       |
| Bcan         | radial glia                     |
| Bhlhe22      | m2alar                          |
| C1ql2        | PAGm2                           |
| Cacna2d1     | -                               |
| Calb1        | E18,5                           |
| Calb2        | E18+SubB                        |
| Cbln2        | E18 -                           |
| Cck          | IF, PAG+ A8+                    |
| Cdh13        | PAGm2, CuF                      |
| Chrna2       |                                 |
| Col6a1       | PAG+                            |
| Ctnnb1       |                                 |
| Dach1        | SubB+                           |
| Dlk1         | IF, PAG, CnF                    |
| Ebf1         |                                 |
| Ebf3         | SubB+ CnF+                      |
| Ecel1        |                                 |
| En1          | IF, A8, TolC+, CnF+             |
| En2          | IF, A8, TolC+. CnF              |
| Enc1         |                                 |
| EphA7        |                                 |
| Fgf15        | alar E11, E13, E15, TolC        |
| Fgf8         |                                 |
| Foxp1        | CnF+ SubB                       |
| Foxp2        | CnF+ E18.5                      |
| Foxp4        | E11.5                           |
| Fxyd6        | P56, PAG, Cnf                   |
| Gad1         | m2 alar                         |
| Gad2         | m2 alar                         |
| GATA2        | basal                           |
| GATA3        | basal, CnF+                     |
| Gfra1        | VTA, IF, CnF+                   |
| Id2          | lCtor?                          |
| Id4          | SubB                            |
| Irs4         | E11.5-E18.5                     |
| Irx1         |                                 |
| Irx2         |                                 |
| Irx3         |                                 |
| Irx4         |                                 |
| Irx5         |                                 |
| Irx6         |                                 |
| Kctd4        | SubB, CnF, PAGm2                |
| Lhx1/Lim1    | E13,5-P4                        |
| Lhx2         | E11.5-E18.5, SubB, PAGm2, lctor |
| Lhx5         | E13,5-E18,5                     |
| Lhx9         | E11.5-E18.5                     |
| Lmx1a        | A8, floor, VTAm2                |

|         |                                      |
|---------|--------------------------------------|
| Lrrtn1  | lim m2/+r0-                          |
| Lypd1   | SubB, CnF, PAGm2                     |
| Meis2   |                                      |
| Myt1    | E13.5                                |
| Myt1l   | E13.5-E18.5                          |
| Nell2   | P56 Sag, CuF, PAGm2                  |
| Nhlh1   |                                      |
| Nhlh2   | IF, PAGm2                            |
| Nkx2.2  | SubB, CnF, PAGm2                     |
| Nnat    | PAGm2, CnF, SubB                     |
| Npy     | PAGm2, CnF, SubB                     |
| Nrcam   | E13.5 m2alar                         |
| Nrp1    | PAGm2, CnF, SubB                     |
| Nts     | Rru, SubB, CnF, PAGm2                |
| Otp     | basPAGm2                             |
| Otx1    |                                      |
| Otx2    | full m2                              |
| Pax2    | E11,5-13,5                           |
| Pax3    |                                      |
| Pax5    | E11,5-P56; IF                        |
| Pax8    | E11,5-P28; IF                        |
| Pbx1    | IF, SubB                             |
| Peg10   |                                      |
| Penk    | m2                                   |
| Pitx1   | VTA, SubB sinı SubB full E11.5-E15.5 |
| Plch1   |                                      |
| Plxna1  | Tor-IC?                              |
| Pou3f2  | Tor-IC?                              |
| Pou3f3  | Tor-IC?                              |
| Pou4f1  | Tor-IC? Mes5                         |
| Pou6f2  | PAGm2bas, SubB, CnF                  |
| Reln    | Tor-IC?                              |
| Rgs4    | PAGm2bas                             |
| Rprm    | PAGm2bas, SubB                       |
| Sall3   | Rru, vzm2                            |
| Sema3f  |                                      |
| Sfrp1   | vz, E11.5, E13.5                     |
| Sim1    |                                      |
| Six3    | SubB, CnF                            |
| Slc6a3  | IF, A8                               |
| Slx17a6 | Rru, CnF, PAGm2alar                  |
| Slc17a8 | DRm2                                 |
| Slx32a1 | SubB, CnF, PAGm2                     |
| Slit1   | E11.5-E13.5                          |
| Sox14   | m2alar                               |
| Sst     | PAGm2bas, Rru, Tor-IC                |
| Tac1    |                                      |
| Tal1    | Rru, SubB, CnF                       |
| Tal2    | PAGm2bas, SubB, CnF, PAGm2alar       |
| Tcf7l2  |                                      |

|        |                    |
|--------|--------------------|
| Trh    | alar, basal        |
| Wnt1   | limit m2-rh0       |
| Wnt8b  |                    |
| Zbtb20 | Drms, m2alar E13.5 |
| Zeb2   | m2alar             |
| Zfhx3  |                    |
| Zfhx4  |                    |

Alar
